# Supplementary material for: Misidentified Human Gene Functions with Mouse Models: The Case of the Retinoblastoma Gene Family in Senescence
Source: PubMed Central journal article supplement — Neoplasia. 2017 Aug 30;19(10):781–90. doi: 10.1016/j.neo.2017.06.005 (PMC5577395; doi:10.1016/j.neo.2017.06.005), 2017-08-30
Supplement: mmc2.pdf [file mmc2.pdf]

# Human and mouse RB1 promoters found in Transcriptional Regulatory Element Database (<https://cb.utdallas.edu/cgi-bin/TRED/tred.cgi?process=searchPromForm>)

## Gene Information

---

|                     |                                                                                                                                                                                                                                                                                                                                                                                                                                                                                                                                                                                                                                   |
|---------------------|-----------------------------------------------------------------------------------------------------------------------------------------------------------------------------------------------------------------------------------------------------------------------------------------------------------------------------------------------------------------------------------------------------------------------------------------------------------------------------------------------------------------------------------------------------------------------------------------------------------------------------------|
| Accession Number    | 7507                                                                                                                                                                                                                                                                                                                                                                                                                                                                                                                                                                                                                              |
| Names               | RB1, RB                                                                                                                                                                                                                                                                                                                                                                                                                                                                                                                                                                                                                           |
| Species             | human, Homo sapiens                                                                                                                                                                                                                                                                                                                                                                                                                                                                                                                                                                                                               |
| Chromosome Location | 13q14.2                                                                                                                                                                                                                                                                                                                                                                                                                                                                                                                                                                                                                           |
| Strand              | +                                                                                                                                                                                                                                                                                                                                                                                                                                                                                                                                                                                                                                 |
| Promoters           | <a href="#">10832</a> ; Quality: 2: known - stated explicitly in GenBank records<br><a href="#">10833</a> ; Quality: 2: known - stated explicitly in GenBank records<br><a href="#">10834</a> ; Quality: 2: known - stated explicitly in GenBank records                                                                                                                                                                                                                                                                                                                                                                          |
| Annotations         | GenBank Nucleotide: <a href="#">BC039060</a> GenBank Nucleotide: <a href="#">BC040540</a> GenBank Nucleotide: <a href="#">L41870</a><br>GenBank Nucleotide: <a href="#">M15400</a> GenBank Nucleotide: <a href="#">M19701</a> GenBank Nucleotide: <a href="#">M28419</a><br>GenBank Nucleotide: <a href="#">M33647</a> GenBank Nucleotide: <a href="#">NM_000321</a> GeneCards: <a href="#">GC13P046675</a><br>GeneCards: <a href="#">GC13P046877</a> UniGene: <a href="#">Hs.408528</a> LocusLink: <a href="#">5925</a><br>View on UCSC Genome Browser for <input type="text" value="hg15"/> : <input type="button" value="Go"/> |

## Gene Information

---

|                     |                                                                                                                                                                                                                                                                      |
|---------------------|----------------------------------------------------------------------------------------------------------------------------------------------------------------------------------------------------------------------------------------------------------------------|
| Accession Number    | 40145                                                                                                                                                                                                                                                                |
| Names               | Rb1, Rb, pRb, Rb-1                                                                                                                                                                                                                                                   |
| Species             | mouse, Mus musculus                                                                                                                                                                                                                                                  |
| Chromosome Location | 14 41.0 cM                                                                                                                                                                                                                                                           |
| Strand              | -                                                                                                                                                                                                                                                                    |
| Promoters           | <a href="#">56310</a> ; Quality: 3.1: refseq,predicted - associated with Refseq, TSS is predicted<br><a href="#">135969</a> ; Quality: 3.2: refseq - associated with Refseq, take Refseq start as TSS                                                                |
| Annotations         | GenBank Nucleotide: <a href="#">M26391</a> GenBank Nucleotide: <a href="#">NM_009029</a> UniGene: <a href="#">Mm.304</a><br>LocusLink: <a href="#">19645</a><br>View on UCSC Genome Browser for <input type="text" value="mm3"/> : <input type="button" value="Go"/> |

# Human and mouse RB2 promoters found in Transcriptional Regulatory Element Database (<https://cb.utdallas.edu/cgi-bin/TRED/tred.cgi?process=searchPromForm>)

## Gene Information

|                     |                                                                                                                                                                                                                                                                                                                                                                                                                                                      |
|---------------------|------------------------------------------------------------------------------------------------------------------------------------------------------------------------------------------------------------------------------------------------------------------------------------------------------------------------------------------------------------------------------------------------------------------------------------------------------|
| Accession Number    | 10654                                                                                                                                                                                                                                                                                                                                                                                                                                                |
| Names               | RBL2, Rb2, P130                                                                                                                                                                                                                                                                                                                                                                                                                                      |
| Species             | human, Homo sapiens                                                                                                                                                                                                                                                                                                                                                                                                                                  |
| Chromosome Location | 16q12.2                                                                                                                                                                                                                                                                                                                                                                                                                                              |
| Strand              | +                                                                                                                                                                                                                                                                                                                                                                                                                                                    |
| Promoters           | <a href="#">15181</a> ; Quality: 2: known - stated explicitly in GenBank records<br><a href="#">116990</a> ; Quality: 3.2: refseq - associated with Refseq, take Refseq start as TSS                                                                                                                                                                                                                                                                 |
| Annotations         | GenBank Nucleotide: <a href="#">BC034490</a> GenBank Nucleotide: <a href="#">NM_005611</a> GenBank Nucleotide: <a href="#">S67171</a><br>GenBank Nucleotide: <a href="#">X74594</a> GenBank Nucleotide: <a href="#">X76061</a> GeneCards: <a href="#">GC16P053246</a><br>UniGene: <a href="#">Hs.283604</a> LocusLink: <a href="#">5934</a><br>View on UCSC Genome Browser for <input type="text" value="hg15"/> : <input type="button" value="Go"/> |

## Gene Information

|                     |                                                                                                                                                                                                                                                                                                                                                                                                                                                         |
|---------------------|---------------------------------------------------------------------------------------------------------------------------------------------------------------------------------------------------------------------------------------------------------------------------------------------------------------------------------------------------------------------------------------------------------------------------------------------------------|
| Accession Number    | 58768                                                                                                                                                                                                                                                                                                                                                                                                                                                   |
| Names               | Rbl2, Rb2, p130                                                                                                                                                                                                                                                                                                                                                                                                                                         |
| Species             | mouse, Mus musculus                                                                                                                                                                                                                                                                                                                                                                                                                                     |
| Chromosome Location | 8 40.99 cM                                                                                                                                                                                                                                                                                                                                                                                                                                              |
| Strand              | +                                                                                                                                                                                                                                                                                                                                                                                                                                                       |
| Promoters           | <a href="#">79826</a> ; Quality: 2: known - stated explicitly in GenBank records<br><a href="#">134196</a> ; Quality: 3.2: refseq - associated with Refseq, take Refseq start as TSS                                                                                                                                                                                                                                                                    |
| Annotations         | GenBank Nucleotide: <a href="#">BC020528</a> GenBank Nucleotide: <a href="#">NM_011250</a> GenBank Nucleotide: <a href="#">U36799</a><br>GenBank Nucleotide: <a href="#">U47333</a> GenBank Nucleotide: <a href="#">U50850</a> GenBank Nucleotide: <a href="#">Z68184</a><br>UniGene: <a href="#">Mm.28027</a> LocusLink: <a href="#">19651</a><br>View on UCSC Genome Browser for <input type="text" value="mm3"/> : <input type="button" value="Go"/> |

# Human and mouse p107 promoters found in Transcriptional Regulatory Element Database (<https://cb.utdallas.edu/cgi-bin/TRED/tred.cgi?process=searchPromForm>)

## Gene Information

|                     |                                                                                                                                                                                                                                                                                                                                                                                                                                                                                            |
|---------------------|--------------------------------------------------------------------------------------------------------------------------------------------------------------------------------------------------------------------------------------------------------------------------------------------------------------------------------------------------------------------------------------------------------------------------------------------------------------------------------------------|
| Accession Number    | 18692                                                                                                                                                                                                                                                                                                                                                                                                                                                                                      |
| Names               | p107, retinoblastoma related protein, RBL1, Homo sapiens retinoblastoma-like 1 , PRB1, CP107, MGC40006                                                                                                                                                                                                                                                                                                                                                                                     |
| Species             | human, Homo sapiens                                                                                                                                                                                                                                                                                                                                                                                                                                                                        |
| Chromosome Location | 20q11.2                                                                                                                                                                                                                                                                                                                                                                                                                                                                                    |
| Strand              | -                                                                                                                                                                                                                                                                                                                                                                                                                                                                                          |
| Promoters           | <a href="#">112853</a> ; Quality: 1: known,curated - experimentally verified and stated explicitly in GenBank records<br><a href="#">26910</a> ; Quality: 3.1: refseq,predicted - associated with Refseq, TSS is predicted<br><a href="#">112541</a> ; Quality: 3.2: refseq - associated with Refseq, take Refseq start as TSS<br><a href="#">115006</a> ; Quality: 3.2: refseq - associated with Refseq, take Refseq start as TSS                                                         |
| Annotations         | GenBank Nucleotide: <a href="#">BC032247</a> GenBank Nucleotide: <a href="#">L14812</a> GenBank Nucleotide: <a href="#">M74547</a><br>GenBank Nucleotide: <a href="#">NM_002895</a> GenBank Nucleotide: <a href="#">NM_183404</a> GeneCards: <a href="#">GC20M035354</a><br>GeneCards: <a href="#">GC20M036311</a> UniGene: <a href="#">Hs.87</a> LocusLink: <a href="#">5933</a><br>View on UCSC Genome Browser for <input type="text" value="hg15"/> : <input type="button" value="Go"/> |

## Gene Information

|                     |                                                                                                                                                                                                                                                                                                                                                                                                                                                         |
|---------------------|---------------------------------------------------------------------------------------------------------------------------------------------------------------------------------------------------------------------------------------------------------------------------------------------------------------------------------------------------------------------------------------------------------------------------------------------------------|
| Accession Number    | 47580                                                                                                                                                                                                                                                                                                                                                                                                                                                   |
| Names               | Rbl1                                                                                                                                                                                                                                                                                                                                                                                                                                                    |
| Species             | mouse, Mus musculus                                                                                                                                                                                                                                                                                                                                                                                                                                     |
| Chromosome Location |                                                                                                                                                                                                                                                                                                                                                                                                                                                         |
| Strand              | -                                                                                                                                                                                                                                                                                                                                                                                                                                                       |
| Promoters           | <a href="#">65671</a> ; Quality: 4: withRNA - associated with other mRNAs                                                                                                                                                                                                                                                                                                                                                                               |
| Annotations         | GenBank Nucleotide: <a href="#">AK012418</a> GenBank Nucleotide: <a href="#">AK033402</a> GenBank Nucleotide: <a href="#">BC023853</a><br>GenBank Nucleotide: <a href="#">U27177</a> GenBank Nucleotide: <a href="#">U27178</a> GenBank Nucleotide: <a href="#">U33320</a><br>UniGene: <a href="#">Mm.2994</a> LocusLink: <a href="#">19650</a><br>View on UCSC Genome Browser for <input type="text" value="mm3"/> : <input type="button" value="Go"/> |

Sequence RB1chr1347814547-700..299humanHomosapiens

Potential transcription factor binding sites found on -700 + 299 region of human RB1 promoter found in ALIBABA2 software (https://www.generegulation.com)

```

=====
seq( 0.. 59) ctgacagacttctattcagcagctactgctccctgaaaatcttctcagacggttccac
Segments:
=====
seq( 60.. 119) ggtgcttcccgttcttacaccactacaatcctttattacactactatccggttcattcccc
Segments:
2.3.1.0 64 73 =====Sp1===
1.1.3.0 74 83 =C/EBPalp=
2.3.1.0 118 127 ==
=====
seq( 120.. 179) acagctccctcccttcccttaaccagtgatcccaaaaggccagcaagtgtctaaca
Segments:
2.3.1.0 118 127 ==Sp1===
2.3.1.0 128 137 =====Sp1===
9.9.539 152 161 =====NF-1==
=====
seq( 180.. 239) tttctatcttctctaagtgactggtaaagttccgcacctatcagcgtccaagtttgttt
Segments:
=====
seq( 240.. 299) tgttttgcccgactttgcaaacggattggcgggatgagaggtggggggcgcgccca
Segments:
1.1.3.0 254 263 ===C/EBP==
2.3.1.0 267 277 =====Sp1===
2.3.1.0 278 289 =====Sp1=====
2.3.1.0 284 297 =====Sp1=====
=====
seq( 300.. 359) ggagggagagtggcgtcccgcgaggggtgactagccagatattccctgcggggcccga
Segments:
2.3.1.0 313 322 =====Sp1===
2.3.1.0 349 358 =====Sp1===
=====
seq( 360.. 419) gagtctccctatcagaccccgggataggatgagggccacagtcaccaccagactctt
Segments:
2.2.1.1 366 375 ===GATA-1=
=====
seq( 420.. 479) tgtatagcccgttaagtgcaccccgccctggaggggggtggttctgggtagaagcacgtc
Segments:
2.3.1.0 439 448 =====Sp1===
2.3.1.0 450 462 =====Sp1=====
1.6.1.0 479 488 =
=====
seq( 480.. 539) cgggccgcgccggatgcctcctggaaggcgcctggaccacgccaggttcccagtttaa
Segments:
1.6.1.0 479 488 AP-2alph=
2.3.1.0 480 489 =====Sp1===
2.3.1.0 495 504 =====Sp1===
=====
seq( 540.. 599) ttctcatgacttagcgtcccagcccgcgaccgaccagcggccagttcccacagacg
Segments:
2.3.1.0 558 567 =====Sp1===
2.3.1.0 582 591 =====Sp1===
2.3.1.0 599 613 =
=====

```

Potential transcription factor binding sites found on -700 + 299 region of human RB1 promoter found in ALIBABA2 software  
 (https://www.generegulation.com)

```

seq( 600.. 659)      ccggcgggcccgggagcctcgcggacgtgacgccggggcggaagtgcgctttcccgcg
Segments:
2.3.1.0      599  613      =====Sp1=====
1.6.1.0      608  617      =AP-2alph=
1.6.1.0      630  641      ==AP-2alphaA
2.3.1.0      631  645      =====Sp1=====
2.3.1.0      640  649      =====Sp1=====
9.9.51      644  653      =====ATF=====
1.3.2.3      649  658      =====E2F=====
=====
seq( 660.. 719)      gttggacgcggcgctcagttgccgggcccggggagggcgctccggttttctcaggggac
Segments:
2.3.1.0      680  694      =====Sp1=====
2.3.2.3      684  693      =====WT1=====
2.3.1.0      687  696      =====Sp1=====
=====
seq( 720.. 779)      gttgaaattattttgtaacgggagtcgggagaggacggggcgctgccccgacgtgcgcgc
Segments:
2.3.1.0      739  749      =====YY1=====
2.3.1.0      753  765      =====Sp1=====
=====
seq( 780.. 839)      gcgctgctctccccggcgctcctccacagctcgtggctcccgccgggaaggcgctcat
Segments:
2.3.1.0      787  796      =====YY1=====
2.3.1.0      797  806      =====Sp1=====
1.1.3.0      802  811      =C/EBPbeta
2.3.1.0      817  826      =====Sp1=====
=====
seq( 840.. 899)      gccgcccaaaacccccgaaaaacggccgccaccgccgctgcccgccgggaaccccc
Segments:
2.3.1.0      866  879      =====Sp1=====
2.3.1.0      872  881      =====Sp1=====
2.3.1.0      880  889      =====Sp1=====
=====
seq( 900.. 959)      ggcaccgcccgccgcccctcctgaggaggaccagagcaggacagcggccggagga
Segments:
2.3.1.0      904  913      =====Sp1=====
2.3.1.0      911  922      =====Sp1=====
=====
seq( 960.. 1019)     cctgcctctcgtcaggtgagcgagcagaccgccgctgcc
Segments:

```

40 segments in this sequence identified as potential binding sites

40 segments in complete file identified as potential binding sites

Sequence Rb1chr1463649271-700..299-mouseMusmusculus

Potential transcription factor binding sites found on -700 + 299 region of mouse RB1 promoter found in ALIBABA2 software  
(<https://www.generegulation.com>)

```

=====
seq( 0.. 59)      ctctctggaatggtacatcttccagggtcttttgaactgcagttatctatttttaagc
Segments:
9.9.539          57  66
=====
seq( 60.. 119)   caatctggtctaataactctggcttcttcaaagccacaccatttctagtcacagctgtgca
Segments:
9.9.539          57  66  ==NF-1==
=====
seq( 120.. 179)  gaaacttcagatgaaaacagctgcattgaaaatagaggcactcccttccccccacctta
Segments:
9.9.428          120 129  ===ISGF-3=
=====
seq( 180.. 239)  aagggtgatttaaattatcttctgtggattaaactatttagagatggtataaattaaata
Segments:
3.1.2.1          227 236  ===Pit-1==
=====
seq( 240.. 299)  ggggatatttaaggtagcatcagctagcatttaagaaaatcactttttctaaactccata
Segments:
9.9.29           255 264  =====AP-1==
=====
seq( 300.. 359)  ctttttgaagaagaatctggtcttgttaggaacaaatttctattttgtcctcaatttag
Segments:
1.1.3.0          327 336  ===C/EBP==
3.5.3.0          359 368  =
=====
seq( 360.. 419)  tttcagttttactagtttgatagttatctcaataacaaagcaatagacagcttccccc
Segments:
3.5.3.0          359 368  ==ICSBP==
1.1.3.0          394 403  =C/EBPalp=
=====
seq( 420.. 479)  tttottcattaagttttgcatgatcatcacacagattagttaggtttaggtcaagggtc
Segments:
9.9.29           441 450  =====AP-1==
2.1.1.4          467 476  =====ER===
=====
seq( 480.. 539)  taccatacttctagggtcttttgctagtgagttcaagttagaattagtgacagaatcatag
Segments:
=====
seq( 540.. 599)  gaatttcagagatcctgcttcogagatttcttaaagctgcagacactgcactattggttt
Segments:
1.1.3.0          599 608  =
=====
seq( 600.. 659)  tgttttttgtaccggttgaactatacattcaaattgctatgttctctattttctataat
Segments:
1.1.3.0          599 608  C/EBPalp=
2.3.2.2          600 609  =====Hb====
3.1.2.2          627 636  ===Oct-1==
=====
seq( 660.. 719)  agtttgctattttaaaataaactagttggtcagagccttactggtgtagatgatctct
Segments:
=====
seq( 720.. 779)  gagttaagtgtttctgcatctgagcttctcctcacatctttccattctgatgaccga

```

```

Segments:
9.9.29      768  777      =====AP-1=====
=====
seq( 780.. 839)      cagatttacagaaatatactttttatgcattcatatggtatgtattatatattaatat
Segments:
=====
seq( 840.. 899)      tctgttctcttggtctcctttttatgaaatgaatttgctaaaaagctgtatgctttg
Segments:
1.1.3.0     863  872      =C/EBPa1p=
=====
seq( 900.. 959)      tgaggccctcccagaaacaggaaaaggagacactaaaaacttgaagcaacgtatacag
Segments:
2.3.1.0     901  912      =====Sp1=====
=====
seq( 960.. 1019)     cagggaatagaaagactgggaagagacagtaggcgctgt
Segments:
2.3.1.0     986  995      =====Sp1=====
=====
16 segments in this sequence identified as potential binding sites

```

---

```

16 segments in complete file identified as potential binding sites

```

---

**Potential transcription factor binding sites found on -700 + 299 region of mouse RB1 promoter found in ALIBABA2 software**

(<https://www.generegulation.com>)





Potential transcription factor binding sites found on -700 + 299 region of human RB2/P130 promoter found in ALIBABA2 software  
 (https://www.generegulation.com)

```

=====
seq( 720.. 779)      gccgtttgaatggctgcgggcccgggccctcacctcacctgaggtccggccgccagggg
Segments:
2.3.1.0      735  748      =====Sp1=====
2.3.1.0      746  755      =====Sp1=====
2.3.1.0      767  776      =====Sp1=====
2.3.1.0      774  785      =====S=====
=====
seq( 780.. 839)      tgcgctatgccgtcgggaggtgaccagtcgccaccgcccccgcctcccctccggcgcg
Segments:
2.3.1.0      774  785      pl=====
2.3.1.0      811  825      =====Sp1=====
2.3.2.3      813  822      =====WT1=====
2.3.2.1      814  823      ==Krox-20=
2.3.1.0      817  831      =====Sp1=====
2.3.1.0      831  841      =====Sp1=====
=====
seq( 840.. 899)      gcagcctcggatgaggaggaggagcagcggcgaggcggaagacgccgcgccctgcc
Segments:
2.3.1.0      831  841      ==
2.3.1.0      854  864      =====Sp1=====
2.3.1.0      870  880      =====Sp1=====
2.3.1.0      886  895      =====Sp1=====
=====
seq( 900.. 959)      gagtgcgccaccctcagatccagcagcggctcgacgagctgtgcagccgcctcaacatg
Segments:
2.3.1.0      905  915      =====Sp1=====
=====
seq( 960.. 1019)     gacgagggcggcggcgaggcctgggacagctaccgca
Segments:
2.3.1.0      963  977      =====Sp1=====
2.3.2.1      966  975      ==Egr-1==
2.3.1.0      972  983      =====Sp1=====

```

32 segments in this sequence identified as potential binding sites

32 segments in complete file identified as potential binding sites

Sequence Rb12chr890406236-700..299mouseMusmusculus

Potential transcription factor binding sites found on -700 + 299 region of mouse RB2/P130 promoter found in ALIBABA2 software (<https://www.generegulation.com>)

```

=====
seq( 0.. 59)      agggttgagggtgagggttttttattttgttttggtagaagtgagatcaattctt
Segments:
2.3.2.2      18  27          =====Hb=====
1.1.3.0      21  30          =C/EBPalp=
=====
seq( 60.. 119)   agctcaatatacctttgccattgatagcgttgacataggagtgtcacttgaggaaacctc
Segments:
=====
seq( 120.. 179)  tctgttgattgacctgtgggtcttgccataggagggtggcgccggtgggtggcgttgt
Segments:
2.1.1.4      129 138          =====ER=====
2.1.2.1      130 139          =RAR-alpha=
2.1.2.1.0    130 139          =====COUP=====
2.3.1.0      151 163          =====Sp1=====
2.3.1.0      160 173          =====Sp1=====
=====
seq( 180.. 239)  attaagaaagtagctgataaagcaacggggagctaaagcagtaagcagcgtcctgttta
Segments:
=====
seq( 240.. 299)  acctccgtcaatgatgaactgtaaagactaaaatgaaataagccctttcctctccgagtt
Segments:
=====
seq( 300.. 359)  ggttacagtcogtgtttatctcagcaacagagactagaaggcaggcaaacattatctt
Segments:
2.2.1.1      312 321          ===GATA-1=
2.3.1.0      338 347          =====Sp1=====
=====
seq( 360.. 419)  ttactttggaccttttagctttactatctgaggacctctaggtgaggatgtgtgtaaag
Segments:
9.9.45       365 374          ===ARP-1==
=====
seq( 420.. 479)  gcttatatactaaatcctgtcgatatttcttggctttttctcttcaaacgagcctctgt
Segments:
1.1.1.5      453 462          =====GCN4=====
=====
seq( 480.. 539)  aatggtctcactattgagagatgctttttaaaccggtagaggacgtgtccattcacccct
Segments:
1.1.5.2      521 530          ===EmBP-1=
1.1.5.3      522 531          =====GBF1=====
=====
seq( 540.. 599)  aatgatgcacagctcgttttttggctttcttcttccatgacttttgggtcctcctgagatc
Segments:
1.1.3.0      557 566          =C/EBPalp=
2.1.2.3      577 586          =REV-ErbA=
=====
seq( 600.. 659)  ccggccgagactacattcccagcaggcgtgctcagacctacgggtgcccgcattgggac
Segments:
=====
seq( 660.. 719)  tgaggaactttggggcggcacagtagcaggacaggctgctgacgggcccggcgtctcgcc
Segments:
2.3.1.0      669 681          =====Sp1=====
2.3.1.0      702 713          =====Sp1=====
=====

```

**Potential transcription factor binding sites found on -700 + 299 region of mouse RB2/P130 promoter found in ALIBABA2 software**  
(<https://www.generegulation.com>)

```
=====
seq( 720.. 779)      gtttgaatggctgcgggcccgccctgagcgcacatctgaagagcccgccctcggggtgc
Segments:
2.3.1.0      732  745      =====Sp1=====
2.3.1.0      738  747      =====Sp1=====
=====
seq( 780.. 839)      gccatggcatctggaggcaaccagtcgccaccgcctcctccagctgctgcagccagctcg
Segments:
2.3.1.0      808  819      =====Sp1=====
3.5.1.2      820  829      ===Adf-1===
=====
seq( 840.. 899)      gaggaagaggaggaggatggcgacgcccgatcgcgcgagccccgggggtccccgagc
Segments:
2.3.1.0      840  854      =====Sp1=====
3.5.1.2      855  864      ===Adf-1===
=====
seq( 900.. 959)      catcagatccagcagcggttcgaggagctgtgcagccgcctcaacatggacgagggcgcg
Segments:
2.3.1.0      951  960      =====Sp1=====
=====
seq( 960.. 1019)     cgcgccgaggcctggagcagctaccgcagcatgagcgaga
Segments:
2.3.1.0      951  960      =
=====
24 segments in this sequence identified as potential binding sites
-----
24 segments in complete file identified as potential binding sites
-----
```

Sequence p107chr2036362838-700..299-humanHomosapiens

Potential transcription factor binding sites found on -700 + 299 region of human P107 promoter found in ALIBABA2 software  
(<https://www.generegulation.com>)

```

=====
seq( 0.. 59)      agtcacgtgaaacagccataggttccctgcctccagaccctattctcctgcctcattac
Segments:
2.3.1.0      24  33              =====Sp1====
1.2.1.0      43  52              =====E1====
=====
seq( 60.. 119)   tgcagtcttctctgcctgcctcttttagcgactagcatgagatgaggattcgtcttctaa
Segments:
=====
seq( 120.. 179)  tatccgtcaccaatccttccctctgtcatttagcgaaccactcactgggcactaggact
Segments:
2.3.1.0      133 143              =====Sp1====
=====
seq( 180.. 239)  ttggggagagtcccaagaggccctcttcgctccaggggctactttttctcttccagcct
Segments:
9.9.590      184 193              =NF-kappaB
2.3.1.0      196 205              =====Sp1====
=====
seq( 240.. 299)  ccattctcctaactcaaggggtacagctcagattatgttggcggccaggacagtgcacaa
Segments:
=====
seq( 300.. 359)  acccagggcccggtggatagaggaggcatctcactacgctgcacgaggccacctgcagta
Segments:
2.3.1.0      302 311              =====Sp1====
2.3.1.0      315 324              =====Sp1====
=====
seq( 360.. 419)  ggtagccagccctgcccacaaacccaagagcctaaccaggaagacagggggaggccgcg
Segments:
2.3.1.0      363 377              =====Sp1=====
2.3.1.0      369 378              =====Sp1====
3.5.1.2      377 386              =====RAP1====
2.3.1.0      402 416              =====Sp1=====
2.3.1.0      413 422              =====Sp1====
=====
seq( 420.. 479)  ggcttcatctcccaagagatggactacacctcccagcaggctctgcgcgggctgagga
Segments:
2.3.1.0      413 422              ===
3.5.2.0      421 430              ===Erg-1==
2.3.1.0      462 473              =====Sp1=====
=====
seq( 480.. 539)  tccctccgctcttttctgtcccggctgggcccccgaccagcaagggccaag
Segments:
2.3.1.0      480 489              =====Sp1====
2.3.1.0      500 509              =====Sp1====
2.3.1.0      511 520              =====Sp1====
1.3.1.2      516 525              =====USF====
9.9.539      523 532              =====NF-1====
=====
seq( 540.. 599)  acaggtctttcagaatctgaggtacatcttcttatcacatttccggggaggactgctag
Segments:
2.3.1.0      582 593              =====Sp1=====
=====
seq( 600.. 659)  gagctccggaggaacacggacttttttgaggagaaaagcggaggcagacggtggatga

```

Potential transcription factor binding sites found on -700 + 299 region of human P107 promoter found in ALIBABA2 software  
 (https://www.generegulation.com)

```

Segments:
2.3.1.0      637  646      =====Sp1=====
=====
seq( 660.. 719)      caacacgtcccgcagctgcagatatttcgcgcgctttggcgcaggtggttggtgagcgc
Segments:
2.3.1.0      663  672      =====Sp1=====
=====
seq( 720.. 779)      gcctgggaggagaaagaagtccggggccgtggcgcagcccgcgggacctgaaggat
Segments:
2.3.1.0      720  731      =====Sp1=====
2.3.1.0      742  751      =====Sp1=====
2.3.1.0      762  771      =====Sp1=====
=====
seq( 780.. 839)      gttcagaggacaagccccacgctgagggggcggtggtcgccgcagccgggagggcgt
Segments:
2.3.1.0      802  813      =====Sp1=====
2.3.1.0      826  839      =====Sp1=====
=====
seq( 840.. 899)      acaggccctgtgccaggagctgaacctggacgagggagcgcggccgaagccctggacga
Segments:
2.3.1.0      840  849      =====Sp1=====
2.3.1.0      871  880      =====Sp1=====
=====
seq( 900.. 959)      ctttactgccatccgaggcaactacagcctagaggtgagcggcagcaggtggggcgccg
Segments:
2.3.1.0      939  948      =====Sp1=====
1.2.1.0      941  950      =====E1=====
1.2.2.0      941  950      =====MRF4=====
2.3.1.0      945  958      =====Sp1=====
=====
seq( 960.. 1019)     gaccctaccctcgccaggccccaccctgccccgccct
Segments:
2.3.1.0      962  971      =====Sp1=====
2.3.1.0      972  986      =====Sp1=====
2.3.1.0      985  997      =====Sp1=====
2.3.2.1      988  997      ==Krox-20=
2.3.2.3      988  997      =====GLI3=====

```

---

38 segments in this sequence identified as potential binding sites

---

38 segments in complete file identified as potential binding sites

---

Sequence Rb11chr2159062088-700..299-mouseMusmusculus

Potential transcription factor binding sites found on -700 + 299 region of mouse P107 promoter found in ALIBABA2 software (https://www.generegulation.com)

```

=====
seq( 0.. 59)      aatgatctcgtgcaggattctgagtgaaaacgatoaggttctagtttaggttttaaaaac
Segments:
=====
seq( 60.. 119)    acctttcaggtaagcgcgaggaccatctctattctctgaaacgactatctactgggacagt
Segments:
=====
seq( 120.. 179)   ttccagaatcctgggagtgaggctgagaccctcaccocaaaccttgcctcgcacccc
Segments:
2.3.1.0      137  146          =====Sp1=====
=====
seq( 180.. 239)   tttctggcgagatttgggagctctgacgtggcgcttctacgtgaagaagccactttcgg
Segments:
1.1.3.0      199  208          =C/EBPalpha=
1.1.1.6      201  210          ==CRE-BP1=
1.1.2.0      201  210          =====CREB=====
2.3.3.0      201  210          =CPE_bind=
1.3.1.2      202  211          =====USF=====
=====
seq( 240.. 299)   cagctcccgcctccacctccatcgagggtcaaagctcagtgagagcgggctggaggcgcg
Segments:
2.3.1.0      243  256          =====Sp1=====
2.3.1.0      249  258          =====Sp1=====
2.3.1.0      283  297          =====Sp1=====
2.3.1.0      291  300          =====Sp1=====
2.3.1.0      298  307          ==
=====
seq( 300.. 359)   ccggggagctgacaacactagggtccacaggacagtgatggagaaggcttcccactag
Segments:
2.3.1.0      291  300          =
2.3.1.0      298  307          ==YY1==
=====
seq( 360.. 419)   cgtgaacggactcgcagctccaagtcacccacaccagggaacccgcggtggagagcgcgg
Segments:
2.3.1.0      413  423          =====Sp
=====
seq( 420.. 479)   ggcgcgagctacagtcocggcagcctcagcaccggctcggatccttccgcccgcctctct
Segments:
2.3.1.0      413  423          l==
2.3.1.0      464  474          =====Sp1=====
1.1.1.6      476  485          ==CR
=====
seq( 480.. 539)   cacgtcctgccccgcggcccgagccccgcagctgccaccacaggcccgagctagatctt
Segments:
1.1.1.6      476  485          E-BP1=
2.3.1.0      485  499          =====Sp1=====
1.6.1.0      490  499          =AP-2alpha=
2.3.1.0      492  501          =====Sp1=====
2.3.1.0      503  512          =====Sp1=====
2.3.1.0      520  529          =====Sp1=====
2.3.1.0      520  532          =====Sp1=====
=====
seq( 540.. 599)   ccgtagagtcocgaggtccatctctattatccattccgggagacgggctgctcggggctc

```

Potential transcription factor binding sites found on -700 + 299 region of mouse P107 promoter found in ALIBABA2 software  
(<https://www.generegulation.com>)

```

Segments:
2.2.1.1      560 569      ==GATA-1=
2.3.1.0      578 587      ==Sp1==
1.6.1.0      584 593      ==AP-2==
=====
seq( 600.. 659)      cagaggagaaaggacttttggagaagaaaagcggaggcagacgatgaagggaaggcgag
Segments:
2.3.1.0      629 638      ==Sp1==
=====
seq( 660.. 719)      ctcaagaaggcgattttcgcgcgctttgtcgcggggggtgtgggtagctcgccgggag
Segments:
2.3.1.0      662 671      ==Sp1==
2.3.1.0      687 696      ==Sp1==
2.3.1.0      693 702      ==Sp1==
=====
seq( 720.. 779)      gaaaagaaaaccccgaaagccgtcgcgccgccctcgggccggagggggatgttcgag
Segments:
2.3.1.0      743 753      ==Sp1==
2.3.1.0      756 765      ==Sp1==
2.3.3.0      764 773      =CPE_bind=
=====
seq( 780.. 839)      gacgagccccacgcccagggggcgccggcggtcgccgcccaggaggcgctgcaggcc
Segments:
2.3.1.0      785 794      ==Sp1==
2.3.1.0      795 806      ==Sp1==
2.3.1.0      820 829      ==Y1==
=====
seq( 840.. 899)      ctgtgccaggaactgaacctggacgagggaaagcggccgaagccctggatgactcagc
Segments:
9.9.1299     843 852      ==MPBF==
3.5.3.0      847 856      ==NF-EM5=
2.3.1.0      860 869      ==Sp1==
=====
seq( 900.. 959)      gccatccgcggaactacagcctagaggtagcggcgccaggtggcgccgccccgacc
Segments:
2.3.1.0      932 941      ==Sp1==
1.2.1.0      935 944      ==E1==
2.3.1.0      941 952      ==Sp1==
2.3.1.0      948 960      ==Sp1==
=====
seq( 960.. 1019)     ctcgccaggccccaccccgcccgccccgccccaaagcc
Segments:
2.3.1.0      948 960      =
2.3.1.0      966 978      ==Sp1==
2.3.2.1      968 977      ==Krox-20=
2.3.1.0      972 986      ==Y1==
1.6.1.0      974 983      =AP-2alph=
2.3.1.0      979 989      ==Sp1==
9.9.561      981 990      ==NF-muE1=
2.3.2.3      982 991      ==WT1==
2.3.1.0      985 994      ==Sp1==
2.3.2.1      985 994      ==Krox-20=
9.9.270      985 994      ==ETF==
1.6.1.0      989 998      =AP-2alph=

```

51 segments in this sequence identified as potential binding sites

51 segments in complete file identified as potential binding sites
