# Supplementary figures and images for: Misidentified Human Gene Functions with Mouse Models: The Case of the Retinoblastoma Gene Family in Senescence
Source: PubMed Central journal article supplement — Neoplasia. 2017 Aug 30;19(10):781–90. doi: 10.1016/j.neo.2017.06.005 (PMC5577395; doi:10.1016/j.neo.2017.06.005), 2017-08-30

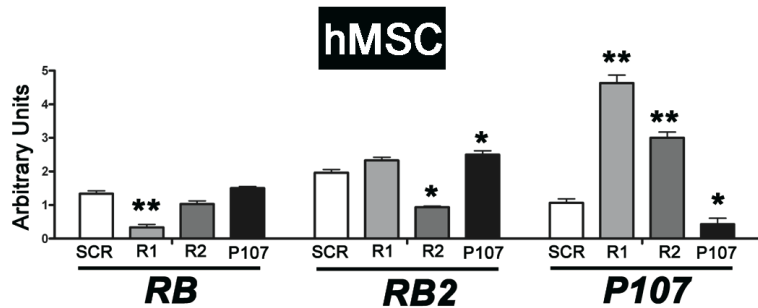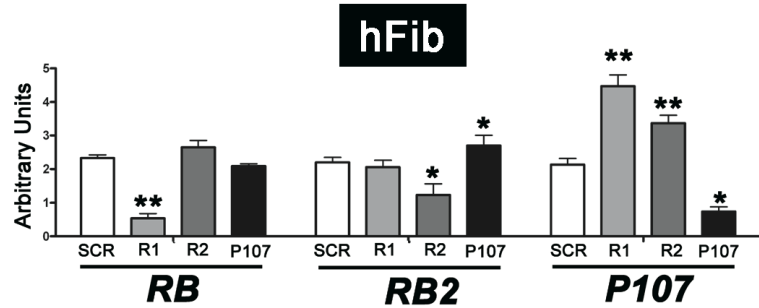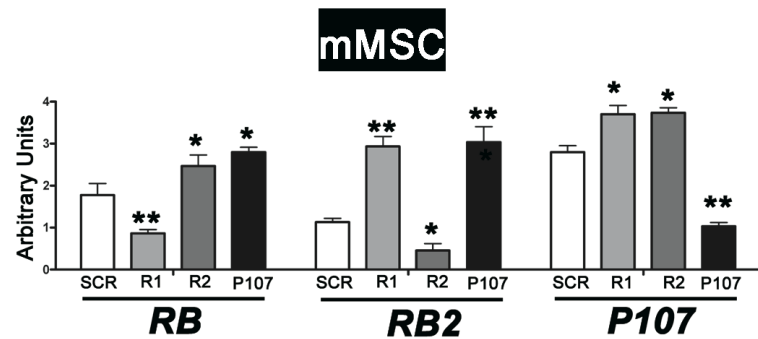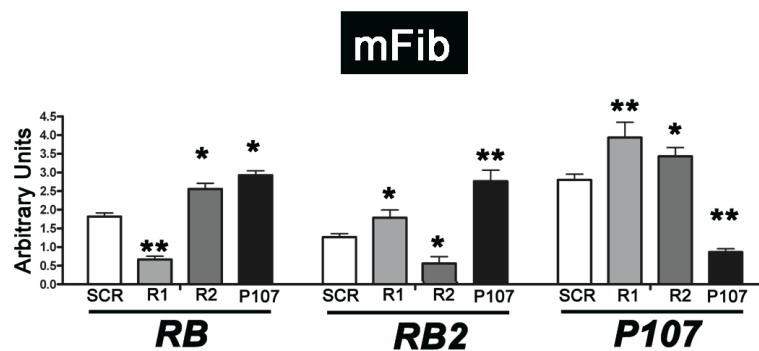

Supplement: mmc1.pdf [file mmc1.pdf]
